# Supplementary material for: A positive feedback loop of lncRNA-RMRP/ZNRF3 axis and Wnt/β-catenin signaling regulates the progression and temozolomide resistance in glioma
Source: PubMed Central journal article supplement (PMC8520527; doi:10.1038/s41419-021-04245-y), 2021-10-16
Supplement: 41419_2021_4245_MOESM1_ESM.pdf [file 41419_2021_4245_MOESM1_ESM.pdf]

**Supplementary Table 1 Sense siRNA sequences of si-NC, si-RMRP#1, si-RMRP#2, si-RMRP#3, si-ZNRF3#1, si-ZNRF3#2, si-ZNRF3#3, si-IGF2BP3#1, si-IGF2BP3#2 and si-IGF2BP3#3**

|              |                                         |
|--------------|-----------------------------------------|
| si-NC        | sense, 5'- UUCUCCGAACGUGUCACGUTT -3'    |
| si-RMRP#1    | sense, 5'- CCUAGGCUACACACUGAGGACUTT -3' |
| si-RMRP#2    | sense, 5'- CGUCAGCUCCUCUAGUUACGTT -3'   |
| si-RMRP#3    | sense, 5'- GCCUGUAUCCUAGGCUACAUTT -3'   |
| si-ZNRF3#1   | sense, 5'-GAAUAUUUAUUUACUAAUAUA -3'     |
| si-ZNRF3#2   | sense, 5'- GAUAUUGUAUGUAAAUGUAAA -3'    |
| si-ZNRF3#3   | sense, 5'- GCUGCUACACUGAGGACUATT -3'    |
| si-IGF2BP3#1 | sense, 5'- AUAAGUAUACAUCUCACAG -3'      |
| si-IGF2BP3#2 | sense, 5'- GAUGAUCACAGUCAUGUUACA -3'    |
| si-IGF2BP3#3 | sense, 5'- GCUAAGAAUAAUUCUAUAAU -3'     |

**Supplementary Table 2 Quantitative PCR primer sequences for GAPDH, RMRP, HOXA-AS3, CASC9, and ZNRF3.**

|                 |                                  |
|-----------------|----------------------------------|
| GAPDH           | F: 5'- GAAGGTGAAGGTCGGAGTC -3'   |
|                 | R: 5'- GAAGATGGTGATGGGATTTC -3'  |
| lncRNA RMRP     | F: 5'- ACTCCAAAGTCCGCCAAGA -3'   |
|                 | R:5'- TGCGTAAGTAGAGGGAGCTGAC -3' |
| lncRNA HOXA-AS3 | F: 5'- ACAAGTAGACAGGGCACTCG -3'  |
|                 | R:5'- GGCTGGAAAGGTCGGTTGTA -3'   |
| lncRNA CASC9    | F: 5'- TTGGTCAGCCACATTCATGGT -3' |
|                 | R:5'- AGTGCCAATGACTCTCCAGC -3'   |
| ZNRF3           | F: 5'- GCGGGTCATCCCCTGTAC -3'    |
|                 | R:5'- GCTTGGGTTTCCCTTTTGTT -3'   |

**Supplementary Table 3 Top 50 down-regulated genes in glioma tissues (n=168) versus normal brain tissues (n=150).**

| gene_id            | gene_name | gene_type      | baseMean | log2FoldChange |
|--------------------|-----------|----------------|----------|----------------|
| ENSG00000214736.7  | TOMM6     | protein_coding | 1374.204 | -13.9316       |
| ENSG00000183762.12 | KREMEN1   | protein_coding | 1168.519 | -13.6978       |
| ENSG00000213578.6  | CPLX3     | protein_coding | 881.104  | -13.1532       |
| ENSG00000100219.16 | XBP1      | protein_coding | 650.0047 | -12.8518       |
| ENSG00000243509.6  | TNFRSF6B  | protein_coding | 563.3238 | -12.6451       |
| ENSG00000213689.14 | TREX1     | protein_coding | 394.5534 | -12.1309       |
| ENSG00000145863.11 | GABRA6    | protein_coding | 1263.159 | -11.0768       |
| ENSG00000103310.10 | ZP2       | protein_coding | 259.5472 | -10.6913       |
| ENSG00000254772.10 | EEF1G     | protein_coding | 10691.19 | -10.0734       |
| ENSG00000139574.8  | NPFF      | protein_coding | 70.47618 | -9.64633       |
| ENSG00000187664.9  | HAPLN4    | protein_coding | 788.5805 | -9.46491       |
| ENSG00000204983.14 | PRSS1     | protein_coding | 66.5347  | -9.14992       |
| ENSG00000259803.7  | SLC22A31  | protein_coding | 1122.359 | -9.14244       |
| ENSG00000161992.6  | PRR35     | protein_coding | 905.7517 | -9.08997       |
| ENSG00000140488.16 | CELF6     | protein_coding | 842.5066 | -8.94603       |
| ENSG00000254852.8  | NPIPA2    | protein_coding | 41.43677 | -8.7939        |

|                           |              |                       |                 |                 |
|---------------------------|--------------|-----------------------|-----------------|-----------------|
| ENSG00000275896.5         | PRSS2        | protein_coding        | 59.96191        | -8.51508        |
| ENSG00000169347.16        | GP2          | protein_coding        | 44.80562        | -8.47527        |
| ENSG00000140506.17        | LMAN1L       | protein_coding        | 222.1373        | -8.46198        |
| ENSG00000183336.8         | BOLA2        | protein_coding        | 30.36661        | -8.29844        |
| ENSG00000124493.13        | GRM4         | protein_coding        | 5095.998        | -8.26487        |
| ENSG00000175535.6         | PNLIP        | protein_coding        | 41.79157        | -8.25373        |
| ENSG00000086570.12        | FAT2         | protein_coding        | 4351.549        | -8.17583        |
| ENSG00000183379.9         | SYNDIG1L     | protein_coding        | 5193.95         | -8.1221         |
| ENSG00000115665.9         | SLC5A7       | protein_coding        | 70.7648         | -8.01853        |
| ENSG00000128271.22        | ADORA2A      | protein_coding        | 1143.007        | -7.97506        |
| ENSG00000189367.15        | KIAA0408     | protein_coding        | 2062.133        | -7.9244         |
| ENSG00000243789.11        | JMJD7        | protein_coding        | 563.5629        | -7.89467        |
| ENSG00000272573.6         | MUSTN1       | protein_coding        | 302             | -7.82681        |
| ENSG00000213927.4         | CCL27        | protein_coding        | 22.78999        | -7.82074        |
| ENSG00000101200.5         | AVP          | protein_coding        | 92.97653        | -7.80529        |
| <b>ENSG00000183579.16</b> | <b>ZNRF3</b> | <b>protein_coding</b> | <b>973.3927</b> | <b>-7.79792</b> |
| ENSG00000188038.8         | NRN1L        | protein_coding        | 69.08776        | -7.77971        |
| ENSG00000142789.20        | CELA3A       | protein_coding        | 24.23641        | -7.7586         |
| ENSG00000100249.4         | C22orf31     | protein_coding        | 15.80291        | -7.48736        |
| ENSG00000170477.13        | KRT4         | protein_coding        | 43.84427        | -7.34327        |
| ENSG00000111245.15        | MYL2         | protein_coding        | 59.22261        | -7.33423        |
| ENSG00000137843.12        | PAK6         | protein_coding        | 1470.04         | -7.32924        |
| ENSG00000171195.11        | MUC7         | protein_coding        | 21.18084        | -7.28611        |
| ENSG00000094796.5         | KRT31        | protein_coding        | 182.3399        | -7.22796        |
| ENSG00000171772.16        | SYCE1        | protein_coding        | 372.6           | -7.20241        |
| ENSG00000243708.10        | PLA2G4B      | protein_coding        | 1990.801        | -7.19196        |
| ENSG00000204001.9         | LCN8         | protein_coding        | 206.1484        | -7.14751        |
| ENSG00000118271.10        | TTR          | protein_coding        | 653.9319        | -7.08388        |
| ENSG00000182450.13        | KCNK4        | protein_coding        | 294.6109        | -7.00745        |
| ENSG00000143032.8         | BARHL2       | protein_coding        | 258.2312        | -6.97137        |
| ENSG00000102924.12        | CBLN1        | protein_coding        | 3189.46         | -6.83188        |
| ENSG00000196689.12        | TRPV1        | protein_coding        | 569.4355        | -6.81289        |
| ENSG00000214338.10        | SOGA3        | protein_coding        | 353.8444        | -6.79365        |

**Supplementary Table 4 Correlation analyses of RMRP level and the top 50 down-regulated genes via GEPIA database.**

| gene_id            | gene_name | gene_type      | R value | P-value |
|--------------------|-----------|----------------|---------|---------|
| ENSG00000214736.7  | TOMM6     | protein_coding | -0.29   | 0.00015 |
| ENSG00000183579.16 | ZNRF3     | protein_coding | -0.29   | 0.00019 |
| ENSG00000254772.10 | EEF1G     | protein_coding | -0.22   | 0.0055  |
| ENSG00000128271.22 | ADORA2A   | protein_coding | -0.21   | 0.007   |
| ENSG00000189367.15 | KIAA0408  | protein_coding | -0.21   | 0.0076  |
| ENSG00000183762.12 | KREMEN1   | protein_coding | -0.2    | 0.0098  |
| ENSG00000100219.16 | XBP1      | protein_coding | -0.2    | 0.0088  |
| ENSG00000243789.11 | JMJD7     | protein_coding | -0.2    | 0.012   |
| ENSG00000213689.14 | TREX1     | protein_coding | -0.19   | 0.017   |
| ENSG00000254852.8  | NPIPA2    | protein_coding | -0.19   | 0.015   |
| ENSG00000214338.10 | SOGA3     | protein_coding | -0.17   | 0.032   |
| ENSG00000188038.8  | NRN1L     | protein_coding | -0.16   | 0.048   |
| ENSG00000137843.12 | PAK6      | protein_coding | -0.16   | 0.041   |

|                    |          |                |        |       |
|--------------------|----------|----------------|--------|-------|
| ENSG00000183379.9  | SYNDIG1L | protein_coding | -0.15  | 0.054 |
| ENSG00000272573.6  | MUSTN1   | protein_coding | -0.15  | 0.055 |
| ENSG00000140488.16 | CELF6    | protein_coding | -0.14  | 0.068 |
| ENSG00000187664.9  | HAPLN4   | protein_coding | -0.12  | 0.13  |
| ENSG00000243708.10 | PLA2G4B  | protein_coding | -0.12  | 0.12  |
| ENSG00000204001.9  | LCN8     | protein_coding | -0.11  | 0.16  |
| ENSG00000182450.13 | KCNK4    | protein_coding | -0.11  | 0.17  |
| ENSG00000171772.16 | SYCE1    | protein_coding | -0.1   | 0.18  |
| ENSG00000196689.12 | TRPV1    | protein_coding | -0.097 | 0.22  |
| ENSG00000243509.6  | TNFRSF6B | protein_coding | -0.082 | 0.3   |
| ENSG00000145863.11 | GABRA6   | protein_coding | -0.07  | 0.38  |
| ENSG00000175535.6  | PNLIP    | protein_coding | -0.067 | 0.39  |
| ENSG00000213927.4  | CCL27    | protein_coding | -0.065 | 0.41  |
| ENSG00000213578.6  | CPLX3    | protein_coding | -0.064 | 0.42  |
| ENSG00000171195.11 | MUC7     | protein_coding | -0.057 | 0.47  |
| ENSG00000118271.10 | TTR      | protein_coding | -0.056 | 0.48  |
| ENSG00000183336.8  | BOLA2    | protein_coding | -0.052 | 0.51  |
| ENSG00000100249.4  | C22orf31 | protein_coding | -0.05  | 0.52  |
| ENSG00000115665.9  | SLC5A7   | protein_coding | -0.047 | 0.55  |
| ENSG00000169347.16 | GP2      | protein_coding | -0.045 | 0.59  |
| ENSG00000139574.8  | NPFF     | protein_coding | -0.044 | 0.58  |
| ENSG00000101200.5  | AVP      | protein_coding | -0.043 | 0.58  |
| ENSG00000124493.13 | GRM4     | protein_coding | -0.041 | 0.61  |
| ENSG00000204983.14 | PRSS1    | protein_coding | -0.04  | 0.64  |
| ENSG00000170477.13 | KRT4     | protein_coding | -0.04  | 0.62  |
| ENSG00000111245.15 | MYL2     | protein_coding | -0.04  | 0.54  |
| ENSG00000094796.5  | KRT31    | protein_coding | -0.039 | 0.62  |
| ENSG00000161992.6  | PRR35    | protein_coding | -0.038 | 0.63  |
| ENSG00000259803.7  | SLC22A31 | protein_coding | -0.036 | 0.65  |
| ENSG00000140506.17 | LMAN1L   | protein_coding | -0.031 | 0.69  |
| ENSG00000143032.8  | BARHL2   | protein_coding | -0.021 | 0.79  |
| ENSG00000086570.12 | FAT2     | protein_coding | -0.01  | 0.9   |
| ENSG00000103310.10 | ZP2      | protein_coding | 0.0035 | 0.96  |
| ENSG00000102924.12 | CBLN1    | protein_coding | 0.018  | 0.82  |
| ENSG00000275896.5  | PRSS2    | protein_coding | 0.025  | 0.75  |
| ENSG00000142789.20 | CELA3A   | protein_coding | 0.16   | 0.044 |

**Supplementary Table 5 Expression patterns of 17 differentially expressed RBPs that had the likelihood to bind with both RMRP and ZNRF3 mRNA.**

| gene_name | gene_type      | baseMean | log2FoldChange |
|-----------|----------------|----------|----------------|
| IGF2BP3   | protein_coding | 309.1855 | 7.126539       |
| IGF2BP1   | protein_coding | 13.30504 | 4.005563       |
| U2AF1     | protein_coding | 39.64123 | 2.069723       |
| IGF2BP2   | protein_coding | 572.0013 | 1.969356       |
| PTBP1     | protein_coding | 6228.647 | 1.66138        |
| EIF4A3    | protein_coding | 2968.521 | 1.458592       |
| XRN2      | protein_coding | 3305.495 | 1.37398        |
| MSI1      | protein_coding | 1341.736 | 1.359946       |
| SRSF9     | protein_coding | 2870.31  | 1.304158       |

|         |                |          |          |
|---------|----------------|----------|----------|
| SF3B4   | protein_coding | 2578.165 | 1.203024 |
| SND1    | protein_coding | 6167.769 | 1.1116   |
| NONO    | protein_coding | 13010.02 | 1.086084 |
| TNRC6A  | protein_coding | 4124.074 | -1.06001 |
| RANGAP1 | protein_coding | 6934.024 | -1.21977 |
| RBFOX2  | protein_coding | 6642.03  | -1.58743 |
| MBNL2   | protein_coding | 4176.68  | -1.6651  |
| ELAVL3  | protein_coding | 7141.248 | -2.37595 |

**Supplementary Table 6 Putative binding sites between IGF2BP3 and ZNRF3 3'UTR by POSTAR2 database.**

| RBP     | RBP info | Tissue type | Position                | Genomic context |
|---------|----------|-------------|-------------------------|-----------------|
| IGF2BP3 | info     | HEK293      | chr22:29055236-29055286 | UTR3            |
| IGF2BP3 | info     | HEK293      | chr22:29056067-29026099 | UTR3            |
| IGF2BP3 | info     | HEK293      | chr22:29056929-29056950 | UTR3            |
| IGF2BP3 | info     | HEK293      | chr22:29057129-29057161 | UTR3            |
| IGF2BP3 | info     | HEK293      | chr22:29057294-29057273 | UTR3            |

**Supplementary file 1 The 2000 bp promoter sequence upstream of the RMRP transcription start site and potential JASPAR-predicted TCF4 binding site (marked in bold) in the promoter sequence (Relative profile score threshold: 90%).**

CAAAAATTAGCCGGGCGTGGT**GGCAGGTGCCT**GTAATCCCAGTTACTTGAGAGGCTG  
AGGCAGGAGAATCGCTTGAACCTGGGAGCCAGAGGTTGCAGTGAGCCGAGATTGCGC  
CGCTGCACTCCAGCCTGGGTGACAGAGCGAGACTCCATCTCGAAAAAACA AAAACT  
TTGGTTGTTAGACAGTTCATGCACAAAGCCAAAATTTGTCCTTTATGTATCTTCTTTCCA  
TAGTGCTTACTGGAGCCTTCCAAAATAATGTCTCCTCAAGGTGACAGCCCCTCAGGAAT  
TTGAAGGCAATGGTCACACCCTCACCCACTTTCCTGAGTTTTTTCTGGTTTATTAACGT  
CAGTCTTTACAGTCAGTGCTCATTGACGGTGGTTTTCTCTGGTTGTTTCTGAACACGT  
AGTGCTCTTAAAGCAATGCCCTGAGGAGAATAACAATTCTCCAGGGGCATTCTGATT**GG**  
**CAGGTGAAG**CACAGTGCCATGTTCCAGCACTGATTGGGAAGTGGCTTGTACATCC  
CACAGTGAACTCAGTCAACTGGAATGCCTAACTCTCTTTCATAAGACCTCCTGCTACAT  
TATGTTTCTCCCAGACTGTACTCAGGTCCAAGAACAGAATTTACTAGTCTATCCTTCTCA  
AAGTTCATCATTAATTCAGTCATTCATCCTAGCCTGTCACATCTACCTGGGGTCATTATT  
AGCTATCTCTTCTAGTTTCATATATCTAAACTGGTTCATCGGTTCTATTTATAATGCAA  
GTACGTAATAGGGTCACGGCTAAAGACACAGCCCTGGAAGGTAAGTGTCTTTTCAAAATG  
TACTGTCAACTTACATTTACAGGGCCTCCTCCCAAGGAGAACATGAGACCACTTCATATC  
TGGAACTCTAGAAACACTGGCTGCAGCAATCAACCTCCTGTGCCAAGGCTGGCCCCAC  
TCTTGTAGCATGGACACTGCTAGCTGGGTTCAAATCCCAGCTCCAGCAGTTGCCAGCG  
CTGGGTGACCTCGAGCAAGTGACTACTCCTCACTGGATTGTAGGAGAATAAATGTGA  
TAGTCATTATTTACAGTTCACACACGCTCTTCACATCCGTTACCTCCCTGGATCCTCAA  
AATAACCTCATAATATTGGAAGGCCAACGGACTACTGTCTTTATTTTACAGACAGGGAA  
GCTGTGTCTTGTCTTGGTACCCTGGCACCCCCATGGGAGATTCGGGCTCAGGGGATCC  
CCACGCCCGGGTCCCG**CACCTG**CAGGGGCACCCCTACCCCCGGCCGCCCGTACC  
TGCAAACACTTGTACAGCACAAAAGCCGCGACGGCCGCGGTGTACAGCGCCCCCAGA

GGCAGCGACCCGGCCCGGGTCCGCTCGCGTTGATCCTTGAGCGGTGGTCGCCGCCGG  
GGTTCCGTGGCTCCAGAGCCGGGGTGGGCTGCGTTCCTGCGGAGGGAGGATACAGG  
CGAGTCAGCCGAGCTGGGGCCTGGGACCCGTGCGCAGTCCCAGCCCTCCTCAGCAG  
CCCTAGCTGGTACCTGGGTGTGCCCGGAGGTCGGGATTGGCGCGGTCTCCTAGGACCC  
CGGACAGCGCAGACACAAGCAGCAGCCCCACCACACCCAAGAGCGAAACTGCGCCC  
GCCATTGCCGGCCACGGGTGGAGGGATCGGGCGGGCGGTGCCGAAGCGGTCCGGCA  
TTGGCCGGCCGCCCAACGCGCACGCGCACGCGAGCAGGCCGGCCGGCTCCGGGGAG  
GCCACGCCCACTCCCCGTAGGGCGGGGCCAGACCATATTTGCATAAGATAGTGTCATTC  
TAGCTTTCCTGTATTTGTTCAATTCGTGTCTATTAGCTATTCTGCTAGCCACAATGCCTCT  
GAAAGCCTATAGTCTTAGAAAGTTATGCCCGAAAACGGTTTTTTTAATCTCACGCCACC  
AACTTCTCACCCTAATCATAAAACACAATTTCTTTAGGGCTATAAAATACTACTCTGTG  
AAGCTGAGGACGTG
